# Supplementary material for: Is There an Association Between Metformin Exposure and Frailty?
Source: PubMed Central journal article supplement (PMC7297486; doi:10.1177/2333721420924956), 2020-06-15
Supplement: Supplemental_material_1.pdf [file Supplemental_material_1.pdf]

## SUPPLEMENTARY MATERIALS 1

### Frailty Index (44-item)

|                                |
|--------------------------------|
| <b>Demographics-Social</b>     |
| 1. Marital Status              |
| 2. VA Service Period           |
| 3. VA Service Connection       |
| 4. Religion                    |
| <b>Medical Conditions</b>      |
| 5. Congestive heart failure    |
| 6. Peripheral vascular disease |
| 7. Coronary disease            |
| 8. COPD                        |
| 9. Stroke                      |
| 10. Hypertension               |
| 11. Atrial Fibrillation        |
| 12. Arthritis                  |
| 13. Osteoporosis               |
| 14. Cancer                     |
| 15. OSA                        |
| <b>N of Medications</b>        |
| 16. > 5                        |
| <b>Psychological</b>           |

|                     |
|---------------------|
| 17. Dementia        |
| 18. Depression      |
| 19. Psychosis       |
| 20. Anxiety         |
| 21. PTSD            |
| 22. Alcohol abuse   |
| 23. Smoking         |
| 24. Substance Abuse |

|                       |
|-----------------------|
| <b>Laboratories</b>   |
| 25. White blood cells |
| 26. Hemoglobin        |
| 27. Platelets         |
| 28. Sodium            |
| 29. Potassium         |
| 30. Chloride          |
| 31. BUN               |
| 32. GFR               |
| 33. Glucose           |
| 34. CO <sub>2</sub>   |

|                            |
|----------------------------|
| <b>Vitals and Measures</b> |
| 35. BMI                    |
| 36. SBP                    |

|                   |
|-------------------|
| 37. DBP           |
| <b>Functional</b> |
| 38. Bathing       |
| 39. Toileting     |
| 40. Feeding       |
| 41. Dressing      |
| 42. Transferring  |
| 43. Incontinence  |

|                         |
|-------------------------|
| <b>Sensory problems</b> |
| 44. Hearing loss        |
