# Supplementary material for: Is There an Association Between Metformin Exposure and Frailty?
Source: PubMed Central journal article supplement (PMC7297486; doi:10.1177/2333721420924956), 2020-06-15
Supplement: SUPPLEMENTARY_MATERIALS_2.pdf [file SUPPLEMENTARY_MATERIALS_2.pdf]

## SUPPLEMENTARY MATERIALS 2

### Participant Characteristics Stratified by Metformin exposure.

| Variable                           | No Metformin<br>(n= 377,<br>49.4%) | Metformin<br>(n= 386,<br>50.6%) | Total<br>(n=763,<br>100%) | p-value          |
|------------------------------------|------------------------------------|---------------------------------|---------------------------|------------------|
| Age (Mean, SD)                     | 74.4 (7.6)                         | 71.3 (5.5)                      | 72.9 (6.8)                | 0.154            |
| Male                               | 373 (49.7)                         | 377 (50.3)                      | 750 (98.3)                | 0.175            |
| Married                            | 187 (50.8)                         | 181 (49.2)                      | 368 (48.2)                | 0.206            |
| White                              | 215 (49.7)                         | 218 (50.3)                      | 433 (56.7)                | 0.88             |
| Non-Hispanic                       | 277 (52.9)                         | 311 (37.1)                      | 588 (77%)                 | <b>0.02</b>      |
| Median Household Income (Mean, SD) | 50503<br>(23715)                   | 54304<br>(24208)                | 52426<br>(24026)          | 0.113            |
| BMI (Mean, SD)                     | 29.4 (5.6)                         | 30.5 (5.5)                      | 30.0 (5.6)                | <b>0.009</b>     |
| DM With Organ Damage*              | 128 (51.8)                         | 119 (48.2)                      | 247 (32.4)                | 0.357            |
| Duration of Diabetes               | 9.3 (5.4)                          | 8.6 (5.2)                       | 9.0 (5.3)                 | 0.093            |
| More than 5 Meds                   | 358 (49.4)                         | 366 (50.6)                      | 724 (94.9)                | 0.929            |
| Insulin or Sulfonylurea            | 205 (50)                           | 205 (50)                        | 410 (53.7)                | 0.725            |
| Glycemic Control                   |                                    |                                 |                           |                  |
| Tight (HbA1C<=7)                   | 219 (52)                           | 202 (48.0)                      | 421 (55.2)                | 0.229            |
| Adequate (HbA1C>7)                 | 120 (45.3)                         | 145 (54.7)                      | 265 (34.7)                |                  |
| Poor (HbA1C>=9)                    | 38 (49.4)                          | 39 (50.7)                       | 77 (10.1)                 |                  |
| CCI_Age (Mean, SD)                 | 6.69 (2.01)                        | 5.99 (1.78)                     | 6.34 (1.93)               | <b>&lt;0.001</b> |

n = number of participants; SD = standard deviation; BMI= body mass index. \*Diabetes with End organ damage: patients diagnosed with one or more of the following diagnosis: retinopathy, neuropathy and nephropathy.

Mann-Whitney U (for non-normally distributed variables) and Chi-Square for continuous variables and categorical variables, respectively. Significant differences between metformin groups are in bold ( $p < .05$ ).
